# Supplementary material for: S-scheme Cs3Bi2Br9/Bi2WO6 heterojunctions for efficient photocatalytic cleavage of C–C bonds in β-1 lignin models
Source: Royal Society of Chemistry journal article supplement (doi:10.1039/d4ta05692b), 2024-01-01
Supplement: d4ta05692b1.pdf [file d4ta05692b1.pdf]

## Supplementary Material

### **S-Scheme Heterojunction Cs<sub>3</sub>Bi<sub>2</sub>Br<sub>9</sub>/Bi<sub>2</sub>WO<sub>6</sub> for Efficient Photocatalytic Cleavage of C-C Bonds in β-1 Lignin Models**

*Huating Jiang,<sup>a, b</sup> Wencai Yang,<sup>a</sup> Xiao Lian,<sup>a</sup> Minxia Liu,<sup>a</sup> Mingxiang Zhu,<sup>a</sup> Huili Li,<sup>a,\*</sup> Fang Zhang<sup>a,\*</sup>*

*<sup>a</sup> The Education Ministry Key Lab of Resource Chemistry, Shanghai Key Laboratory of Rare Earth Functional Materials, College of Chemistry and Materials Science, Shanghai Normal University, Shanghai 200234, China*

*<sup>b</sup> School of Chemistry and Molecular Engineering, East China University of Science and Technology, Shanghai 200237, China*

*\* Corresponding authors: [li\\_huili@shnu.edu.cn](mailto:li_huili@shnu.edu.cn); [zhangfang@shnu.edu.cn](mailto:zhangfang@shnu.edu.cn)*

## Table of Contents

|                                                       |    |
|-------------------------------------------------------|----|
| 1. Experimental Section.....                          | 3  |
| 1.1 Synthesis of lignin models. ....                  | 3  |
| 1.2 Emission decays spectra and kinetic analysis..... | 5  |
| 1.3 Calculation method for catalytic tests.....       | 5  |
| 2. Results and Discussion .....                       | 7  |
| 3. NMR Spectra .....                                  | 25 |
| 4. References.....                                    | 41 |

# 1. Experimental Section

**1.1 Synthesis of lignin models.** Lignin models were prepared according to a procedure described in the literature. (Wu et al., 2021)

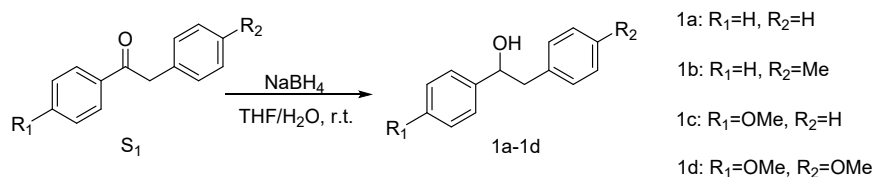

S<sub>1</sub> (10 mmol, 1 eq.) was added into THF/water solvent (50 mL, v/v = 4/1) in a bottle (100 mL). Afterward, NaBH<sub>4</sub> (12 mmol, 1.2 eq.) was added and the mixture was stirred at room temperature (r. t.) for 2 h. Then, an excess of saturated NH<sub>4</sub>Cl aqueous solution (30 mL) was added. The crude product was extracted with ethyl acetate (20 mL × 3). The combined organic extracts were dried over anhydrous Na<sub>2</sub>SO<sub>4</sub>. The solvent was then concentrated in vacuo and the resulting white solid was dried at 45 °C for 8 h to obtain the products 1a-1d.

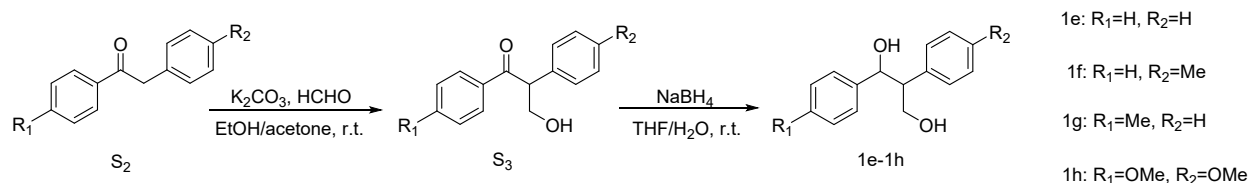

To a stirring suspension of K<sub>2</sub>CO<sub>3</sub> (4.4 mmol, 1.1 eq.) in ethanol/acetone (v/v = 1/1, 20 mL) and S<sub>2</sub> (4 mmol, 1 eq.) at r. t. under N<sub>2</sub> atmosphere, a water solution of HCHO (36.5-38.0 wt%, 0.6 mL, 7.3 mmol, 1.8 eq.) was added. After 4 h, the reaction mixture was filtered to remove K<sub>2</sub>CO<sub>3</sub> and concentrated in vacuo to get a solid product. The crude product was purified on silica gel to obtain S<sub>3</sub>.

The synthesized S<sub>3</sub> (10 mmol, 1 eq.) was added into THF/water solvent (50 mL, v/v = 4/1) in a bottle (100 mL). Afterward, NaBH<sub>4</sub> (12 mmol, 1.2 eq.) was added and the system was stirred at room temperature (r. t.) for 2 h. Then, an excess of saturated NH<sub>4</sub>Cl aqueous solution (30 mL) was added. The crude product was extracted with ethyl acetate (20 mL × 3). The combined organic extracts were dried over anhydrous Na<sub>2</sub>SO<sub>4</sub>. The solvent was concentrated in vacuo and the obtained white solid was dried at 45°C for 8 h to obtain the product 1e-1h.

**1,2-Diphenylethanol (1a):** white solid. <sup>1</sup>H NMR (400 MHz, DMSO-*d*<sub>6</sub>) δ 7.34-7.30 (m, 4H), 7.29-

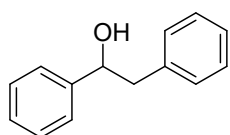

7.22 (m, 3H), 7.17 (d, J = 7.3 Hz, 3H), 5.33 (d, J = 4.7 Hz, 1H), 4.78 (dt, J = 7.7, 5.2 Hz, 1H), 2.91 (t, J = 6.7 Hz, 2H). <sup>13</sup>C NMR (101 MHz, DMSO-*d*<sub>6</sub>) δ 145.7,

139.1, 129.5, 127.9, 127.8, 126.7, 126.0, 125.8, 73.8, 45.7.

**1-Phenyl-2-(p-tolyl)ethan-1-ol (1b):** white solid.  $^1\text{H}$  NMR (400 MHz,  $\text{DMSO-}d_6$ )  $\delta$  7.30-7.26 (m,

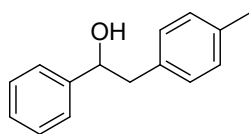

4H), 7.23-7.18 (m, 1H), 7.02 (s, 4H), 5.25 (d,  $J = 4.6$  Hz, 1H), 4.72 (ddd,  $J = 7.4, 5.8, 4.6$  Hz, 1H), 2.83 (t,  $J = 7.0$  Hz, 2H), 2.254 (s, 3H).  $^{13}\text{C}$  NMR (101 MHz,  $\text{DMSO-}d_6$ )  $\delta$  145.8, 136.0, 134.6, 129.4, 128.4, 127.8, 126.7, 126.0, 73.9,

45.3, 20.7.

**1-(4-Methoxyphenyl)-2-phenylethan-1-ol (1c):** white solid.  $^1\text{H}$  NMR (400 MHz,  $\text{DMSO-}d_6$ )  $\delta$  7.23-

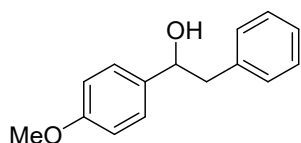

7.20 (m, 4H), 7.17-7.13 (m, 3H), 6.86-6.83 (m, 2H), 5.20 (d,  $J = 4.6$  Hz, 1H), 4.70 (dt,  $J = 7.7, 5.3$  Hz, 1H), 3.72 (s, 3H), 2.87 (qd,  $J = 13.4, 6.6$  Hz, 2H).  $^{13}\text{C}$  NMR (101 MHz,  $\text{DMSO-}d_6$ )  $\delta$  158.1, 139.2, 137.7, 129.5, 127.8, 127.2,

125.8, 113.2, 73.4, 55.0, 45.7.

**1,2-Bis(4-methoxyphenyl)ethan-1-ol (1d):** white solid.  $^1\text{H}$  NMR (400 MHz,  $\text{DMSO-}d_6$ )  $\delta$  7.20-7.12

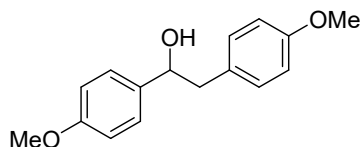

(m, 2H), 7.09-6.98 (m, 2H), 6.90-6.81 (m, 2H), 6.80-6.73 (m, 2H), 5.14 (d,  $J = 4.5$  Hz, 1H), 4.64 (ddd,  $J = 7.4, 5.8, 4.4$  Hz, 1H), 3.73 (s, 3H), 3.70 (s, 3H), 2.80 (dd,  $J = 16.1, 6.7$  Hz, 2H).  $^{13}\text{C}$  NMR (101 MHz,  $\text{DMSO-}d_6$ )  $\delta$  158.1, 157.4, 137.8, 131.1, 130.4, 127.2, 113.2, 113.2, 73.5, 55.0, 54.9, 44.8.

**1,2-Diphenylpropane-1,3-diol (1e):** white solid.  $^1\text{H}$  NMR (400 MHz,  $\text{DMSO-}d_6$ )  $\delta$  7.24-7.19 (m, 2H),

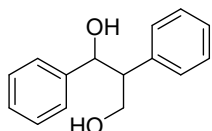

7.15 (dd,  $J = 7.6, 5.9$  Hz, 5H), 7.10 (dd,  $J = 7.9, 1.8$  Hz, 3H), 5.20 (d,  $J = 4.5$  Hz, 1H), 5.00 (t,  $J = 5.0$  Hz, 1H), 4.54 (t,  $J = 5.1$  Hz, 1H), 3.72 (ddd,  $J = 10.4, 6.8, 5.2$  Hz, 1H), 3.53 (ddd,  $J = 10.4, 6.9, 5.0$  Hz, 1H), 2.90 (td,  $J = 6.7, 5.3$  Hz, 1H).  $^{13}\text{C}$

NMR (101 MHz,  $\text{DMSO-}d_6$ )  $\delta$  145.1, 140.48, 129.5, 127.5, 127.3, 126.4, 126.2, 125.8, 72.2, 62.6, 55.7.

**1-Phenyl-2-(p-tolyl)propane-1,3-diol (1f):** white solid.  $^1\text{H}$  NMR (400 MHz,  $\text{DMSO-}d_6$ )  $\delta$  7.21-7.19

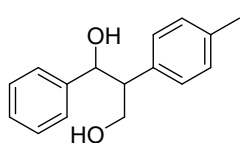

(m, 2H), 7.18-7.12 (m, 3H), 6.97 (s, 4H), 5.17 (d,  $J = 4.5$  Hz, 1H), 4.99 (t,  $J = 4.8$  Hz, 1H), 4.53 (t,  $J = 5.1$  Hz, 1H), 3.71 (ddd,  $J = 10.4, 7.1, 5.4$  Hz, 1H), 3.49 (ddd,  $J = 10.4, 6.7, 4.9$  Hz, 1H), 2.86 (td,  $J = 6.9, 5.0$  Hz, 1H), 2.23 (s, 3H).  $^{13}\text{C}$  NMR

(101 MHz,  $\text{DMSO-}d_6$ )  $\delta$  145.1, 137.2, 134.5, 129.4, 127.9, 127.5, 126.3, 126.2, 72.1, 62.7, 55.3, 20.8.

**2-Phenyl-1-(p-tolyl)propane-1,3-diol (1g):** white solid.  $^1\text{H}$  NMR (400 MHz,  $\text{DMSO-}d_6$ )  $\delta$  7.20-7.15

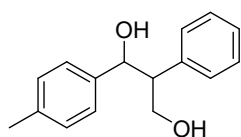

(m, 2H), 7.15-7.09 (m, 3H), 7.07 (d,  $J = 8.6$  Hz, 2H), 6.81-6.75 (m, 2H), 5.08 (d,  $J = 4.4$  Hz, 1H), 4.92 (t,  $J = 5.1$  Hz, 1H), 4.48 (t,  $J = 5.1$  Hz, 1H), 3.70 (s, 3H), 3.69-3.64 (m, 1H), 3.56-3.43 (m, 1H), 2.86 (m,  $J = 6.5$  Hz, 1H).  $^{13}\text{C}$  NMR (101

MHz,  $\text{DMSO-}d_6$ )  $\delta$  157.8, 140.8, 137.0, 129.5, 127.3, 127.3, 125.8, 112.9, 71.9, 62.7, 55.8, 54.9.

**1,2-Bis(4-methoxyphenyl)propane-1,3-diol (1h):** white solid.  $^1\text{H}$  NMR (400 MHz,  $\text{DMSO-}d_6$ )  $\delta$

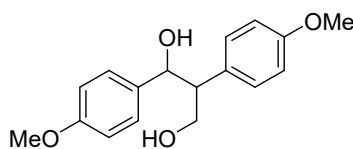

7.10-6.97 (m, 4H), 6.81-6.69 (m, 4H), 5.04 (d,  $J = 4.4$  Hz, 1H), 4.91 (t,  $J = 4.8$  Hz, 1H), 4.47 (t,  $J = 5.1$  Hz, 1H), 3.69 (s, 3H), 3.69 (s, 3H), 3.67-3.61 (m, 1H), 3.47 (dd,  $J = 5.2, 1.6$  Hz, 1H), 2.81 (d,  $J = 5.2$  Hz, 1H).

$^{13}\text{C}$  NMR (101 MHz,  $\text{DMSO-}d_6$ )  $\delta$  157.8, 157.5, 137.1, 132.4, 130.3, 127.3, 112.9, 112.8, 71.8, 62.8, 54.9, 54.9, 54.8.

## 1.2 Emission decays spectra and kinetic analysis.

The emission decay of photocatalyst was studied and the decay curve for the sample was well fitted with double-exponential function  $Y_{(t)}$ : (Gan et al., 2023)

$$Y_{(t)} = A_1 \exp\left(-\frac{t}{\tau_1}\right) + A_2 \exp\left(-\frac{t}{\tau_2}\right) \quad (\text{Equation 1})$$

The average emission time  $\tau_{\text{avg}}$  of photocatalyst was calculated from **Equation (2)**:

$$\tau_{\text{avg}} = \frac{A_1 \tau_1^2 + A_2 \tau_2^2}{A_1 \tau_1 + A_2 \tau_2} \quad (\text{Equation 2})$$

Where  $A_1, A_2$  are functional contributions of time-resolved emission decay lifetime  $\tau_1, \tau_2$ .

## 1.3 Calculation method for catalytic tests.

The conversion and yield were determined by HPGC analysis with internal standard of acetophenone. The details can be calculated using the following **Equation 3**:

$$\text{Conversion (1a)} = \left(1 - \frac{R_{(1a)}}{R_{(\text{acetophenone})}} \bigg/ \frac{S_{(1a)}}{S_{(\text{acetophenone})}}\right) \times 100\% \quad (\text{Equation 3})$$

$R_{(1a)}$  and  $R_{(\text{acetophenone})}$  are the peak areas of the corresponding compounds in the HPGC of the after reaction,  $S_{(1a)}$  and  $S_{(\text{acetophenone})}$  are the peak areas of the corresponding compounds in the HPGC of the standard samples.

The yield of products (**2a**, **3a**, **4a** and **5a**) were determined by applying the following equations:

$$\text{Yield (2a - 4a)} = \frac{1}{2} \times \left(\frac{R_{(2a-4a)}}{R_{(\text{acetophenone})}} \bigg/ \frac{S_{(2a-4a)}}{S_{(\text{acetophenone})}}\right) \times 100\% \quad (\text{Equation 4})$$

$$\text{Yield (5a)} = \left(\frac{R_{(5a)}}{R_{(\text{acetophenone})}} \bigg/ \frac{S_{(5a)}}{S_{(\text{acetophenone})}}\right) \times 100\% \quad (\text{Equation 5})$$

$R_{(2a-5a)}$  and  $R_{(\text{acetophenone})}$  are the peak areas of the corresponding compounds in the HPGC of the after reaction,  $S_{(2a-5a)}$  and  $S_{(\text{acetophenone})}$  are the peak areas of the corresponding compounds in the HPGC of the standard samples.

## 2. Results and Discussion

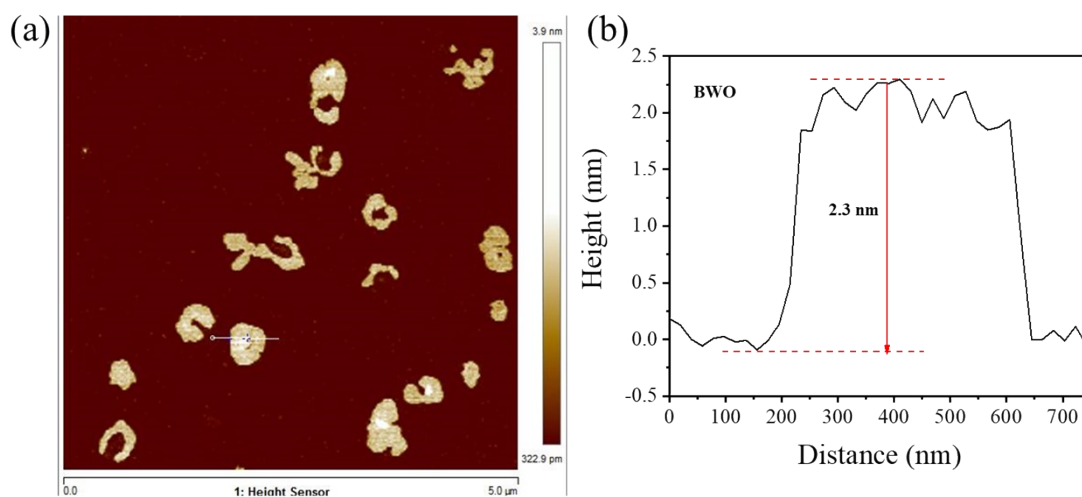

**Fig. S1.** (a) AFM image of BWO. (b) The AFM height cutaway view of BWO.

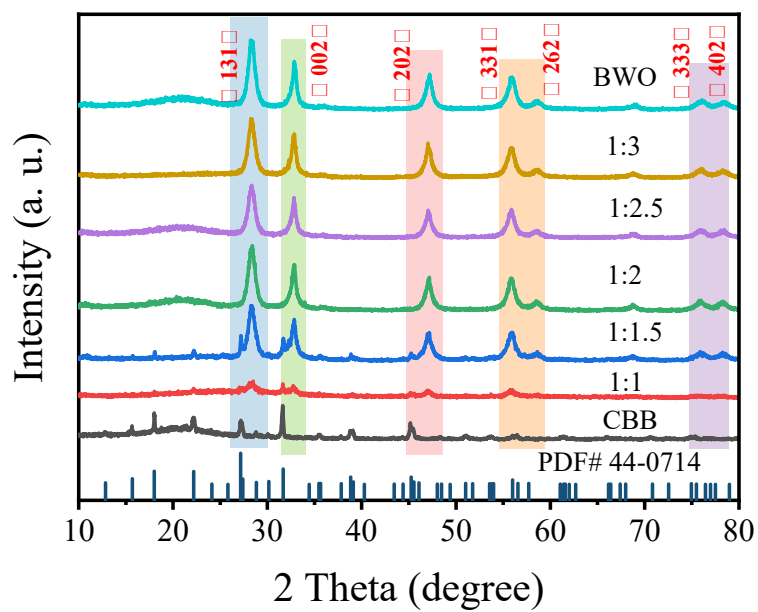

**Fig. S2.** XRD patterns of the as-prepared samples.

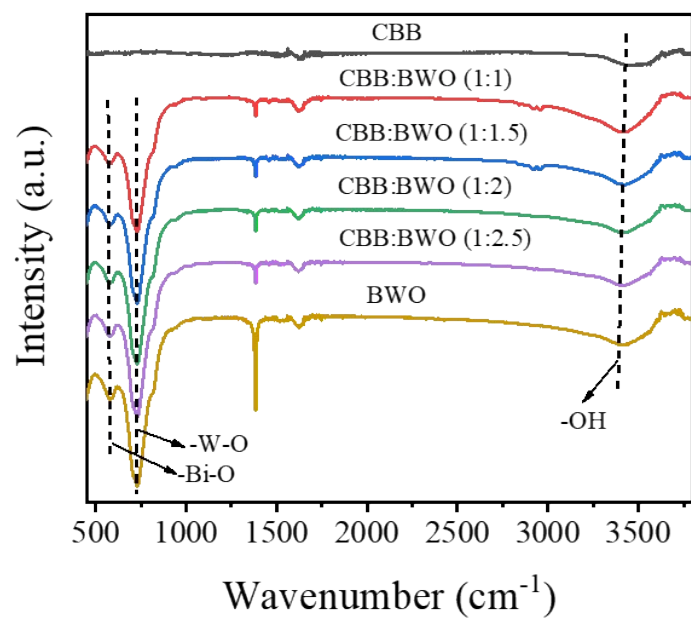

**Fig. S3.** FTIR spectra of the as-prepared samples.

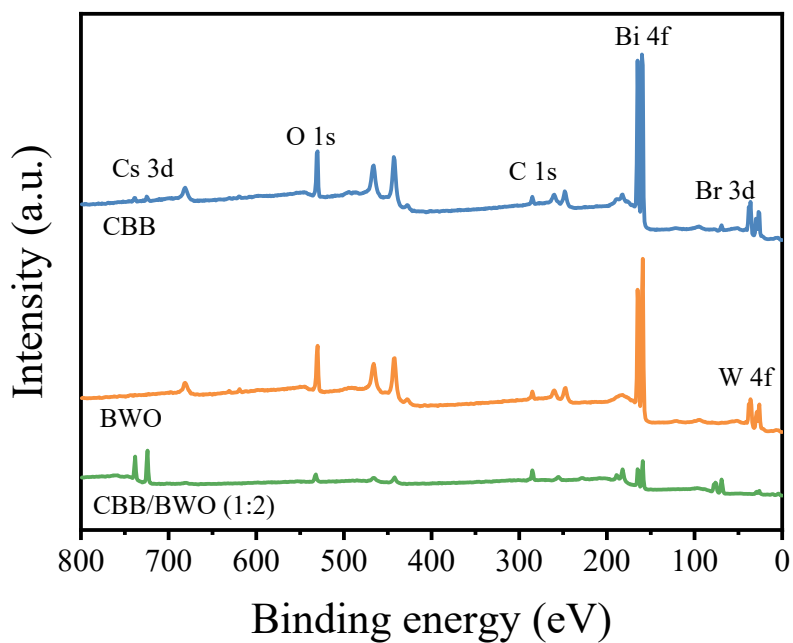

**Fig. S4.** Full XPS spectra of pristine CBB, BWO and CBB/BWO (1:2).



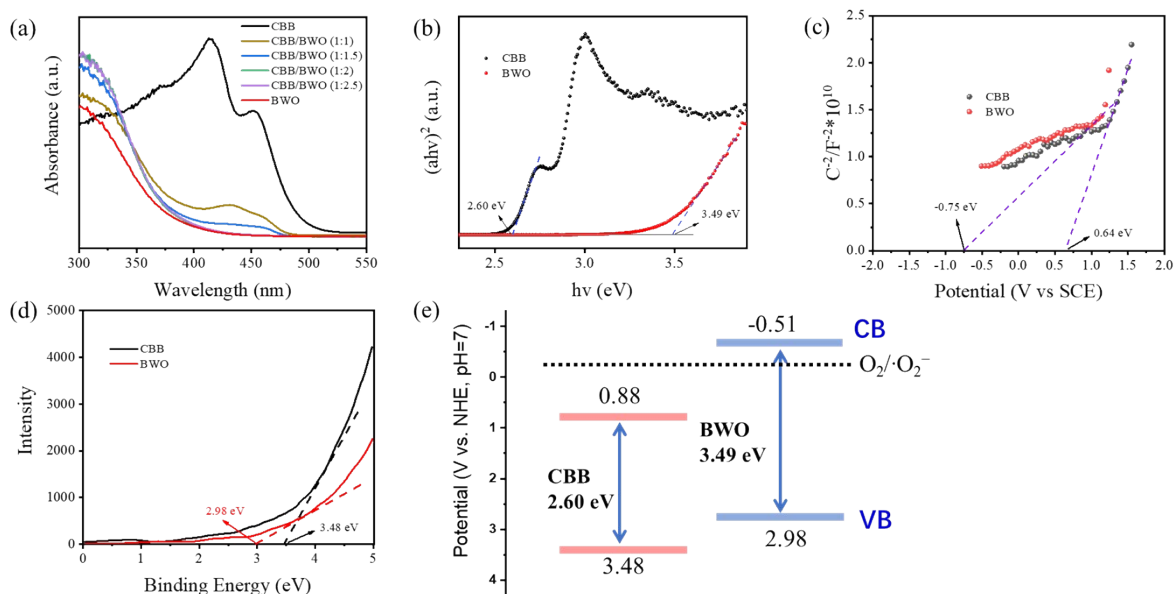

**Fig. S5.** (a) UV-vis DRS of CBB, BWO, and different ratios of composites. (b) Kubelka-Munk plots. (c) Mott-Schottky plots. (d) XPS valence band spectroscopy of CBB and BWO. (e) Band structures of CBB and BWO.

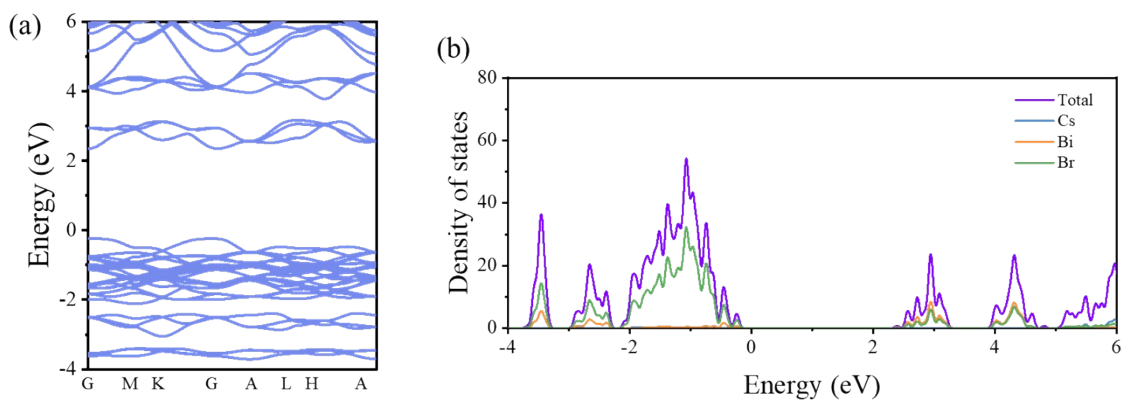

**Fig. S6.** (a) Electronic band structures of CBB (001) facet. (b) The density of states (DOS) of CBB (001) facet.

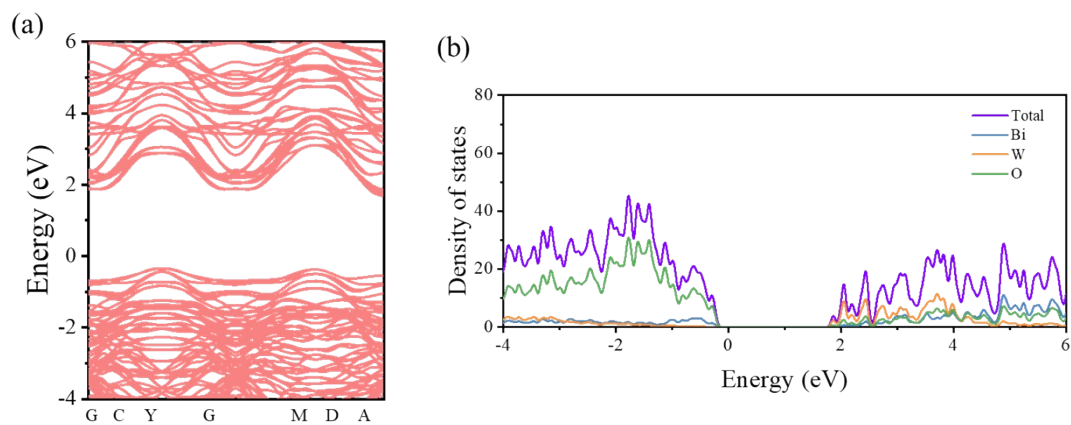

**Fig. S7.** (a) Electronic band structures of BWO (100) facet. (b) The density of states (DOS) of BWO (100) facet.

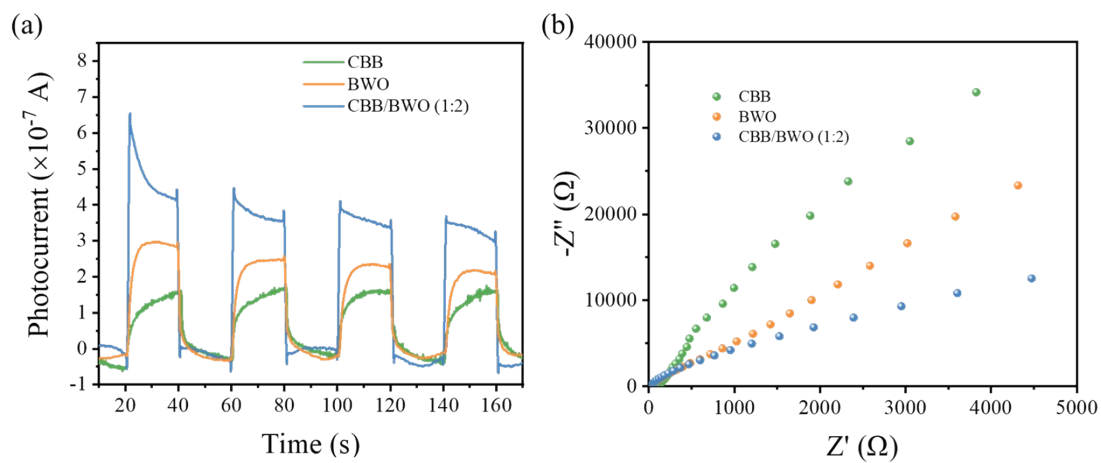

**Fig. S8.** (a) Transient photocurrent response and (b) Nyquist plots of CBB, BWO and CBB/BWO (1:2).

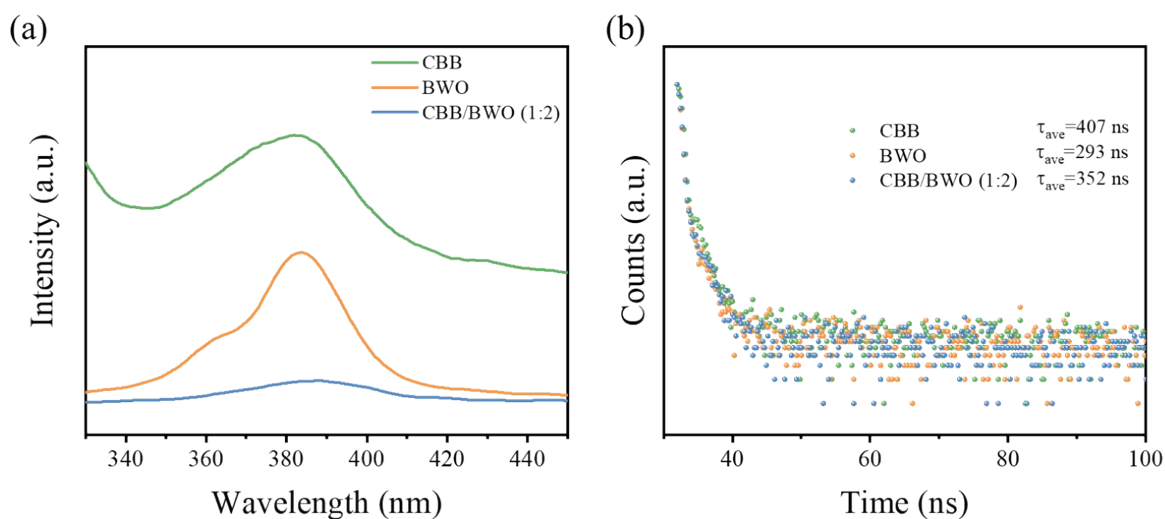

**Fig. S9.** (a) Photoluminescence (PL) spectra and (b) TRPL spectra of CBB, BWO and CBB/BWO (1:2) at emission wavelengths of 385 nm.

**Table S1.** Photocatalytic activity of different photocatalysts for cleavage of substrate **1a**.<sup>a</sup>

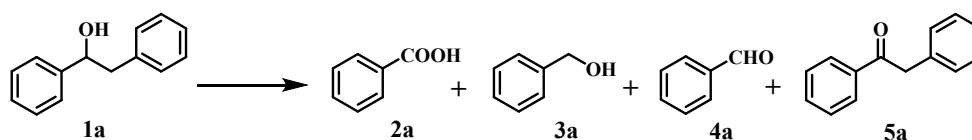

| Entry | P. C.           | Conversion (%) | Yield (%) <sup>b</sup> |    |    |    | $S_{C\alpha-C\beta}$ (%) |
|-------|-----------------|----------------|------------------------|----|----|----|--------------------------|
|       |                 |                | 2a                     | 3a | 4a | 5a |                          |
| 1     | CBB             | 12             | 0                      | 0  | 1  | 8  | 8                        |
| 2     | CBB/BWO (1:1)   | 54             | 1                      | 1  | 34 | 16 | 67                       |
| 3     | CBB/BWO (1:1.5) | 62             | 1                      | 1  | 42 | 13 | 71                       |
| 4     | CBB/BWO (1:2)   | 99             | 21                     | 1  | 62 | 12 | 85                       |
| 5     | CBB/BWO (1:2.5) | 99             | 8                      | 1  | 74 | 13 | 84                       |
| 6     | CBB/BWO (1:3)   | 99             | 25                     | 0  | 58 | 11 | 84                       |
| 7     | BWO             | 50             | 3                      | 2  | 38 | 5  | 86                       |

<sup>a</sup>Reaction conditions: 0.10 mmol **1a**, 3.0 mL CH<sub>2</sub>Cl<sub>2</sub>, 20 mg catalys, 30 W blue LEDs, O<sub>2</sub>, 12 h. <sup>b</sup>The quantification was performed by means of HPGC analysis using acetophenone as an internal standard.

**Table S2.** Control Experiment.<sup>a</sup>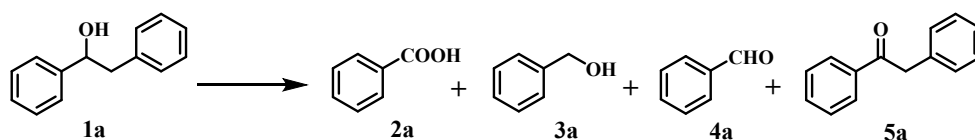

| Entry | Conditions                                           | Conversion (%) | Yield (%) <sup>b</sup> |    |    |    | S <sub>C<math>\alpha</math>-C<math>\beta</math></sub> (%) |
|-------|------------------------------------------------------|----------------|------------------------|----|----|----|-----------------------------------------------------------|
|       |                                                      |                | 2a                     | 3a | 4a | 5a |                                                           |
| 1     | CBB/BWO (1:2)                                        | 99             | 21                     | 1  | 62 | 12 | 85                                                        |
| 2     | No P.C.                                              | 0              | 0                      | 0  | 0  | 0  | 0                                                         |
| 3     | No light                                             | 0              | 0                      | 0  | 0  | 0  | 0                                                         |
| 4     | MPA                                                  | 0              | 0                      | 0  | 0  | 0  | 0                                                         |
| 5     | CsBr                                                 | 0              | 0                      | 0  | 0  | 0  | 0                                                         |
| 6     | BiBr <sub>3</sub>                                    | 60             | 0                      | 0  | 0  | 55 | 0                                                         |
| 7     | Bi(NO <sub>3</sub> ) <sub>3</sub> ·5H <sub>2</sub> O | 0              | 0                      | 0  | 0  | 0  | 0                                                         |
| 8     | Na <sub>2</sub> WO <sub>4</sub> ·2H <sub>2</sub> O   | 0              | 0                      | 0  | 0  | 0  | 0                                                         |

<sup>a</sup>Reaction conditions: 0.10 mmol **1a**, 3.0 mL CH<sub>2</sub>Cl<sub>2</sub>, 20 mg CBB/BWO (1:2), 30 W blue LEDs, O<sub>2</sub>, 12 h. <sup>b</sup>The quantification was performed by means of HPGC analysis using acetophenone as an internal standard.

**Table S3.** Catalytic performances of varying amounts of CBB/BWO (1:2).<sup>a</sup>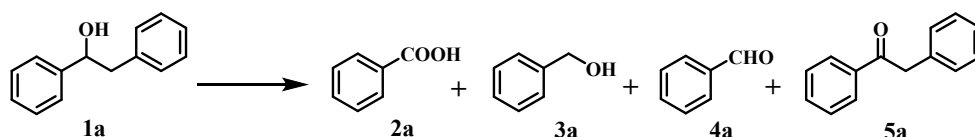

| Entry | CBB/BWO (mg) | Conversion (%) | Yield (%) <sup>b</sup> |    |    |    | S <sub>C<math>\alpha</math>-C<math>\beta</math></sub> (%) |
|-------|--------------|----------------|------------------------|----|----|----|-----------------------------------------------------------|
|       |              |                | 2a                     | 3a | 4a | 5a |                                                           |
| 1     | 5            | 48             | 3                      | 2  | 35 | 7  | 83                                                        |
| 2     | 10           | 81             | 9                      | 3  | 58 | 11 | 86                                                        |
| 3     | 15           | 94             | 6                      | 2  | 71 | 14 | 84                                                        |
| 4     | 20           | 99             | 21                     | 1  | 62 | 12 | 85                                                        |
| 5     | 25           | 93             | 12                     | 2  | 59 | 18 | 79                                                        |

<sup>a</sup>Reaction conditions: 0.10 mmol **1a**, 3.0 mL CH<sub>2</sub>Cl<sub>2</sub>, CBB/BWO (1:2), 30 W blue LEDs, O<sub>2</sub>, 12 h. <sup>b</sup>The quantification was performed by means of HPGC analysis using acetophenone as an internal standard.

**Table S4.** Catalytic performances of CBB/BWO (1:2) with different solvents.<sup>a</sup>

| Entry | Solvent                            | Conversion (%) | Yield (%) <sup>b</sup> |    |    |    | S <sub>C<math>\alpha</math>-C<math>\beta</math></sub> (%) |
|-------|------------------------------------|----------------|------------------------|----|----|----|-----------------------------------------------------------|
|       |                                    |                | 2a                     | 3a | 4a | 5a |                                                           |
| 1     | CH <sub>3</sub> CN                 | 36             | 2                      | 0  | 8  | 25 | 26                                                        |
| 2     | 1,2-Dichloroethane                 | 95             | 8                      | 1  | 36 | 23 | 48                                                        |
| 3     | Acetone                            | 18             | 0                      | 0  | 0  | 17 | 0                                                         |
| 4     | CH <sub>2</sub> Cl <sub>2</sub>    | 99             | 21                     | 1  | 62 | 12 | 85                                                        |
| 5     | CH <sub>3</sub> CH <sub>2</sub> OH | 15             | 0                      | 0  | 0  | 14 | 0                                                         |
| 6     | 1,4-Dioxane                        | 17             | 0                      | 0  | 0  | 16 | 0                                                         |
| 7     | N,N-Dimethylformamide              | 4              | 0                      | 0  | 0  | 3  | 0                                                         |

<sup>a</sup>Reaction conditions: 0.10 mmol **1a**, 3.0 mL solvent, 20 mg CBB/BWO (1:2), 30 W blue LEDs, O<sub>2</sub>, 12 h. <sup>b</sup>The quantification was performed by means of HPGC analysis using acetophenone as an internal standard.

**Table S5.** Catalytic performances of CBB/BWO (1:2) with different reaction time.<sup>a</sup>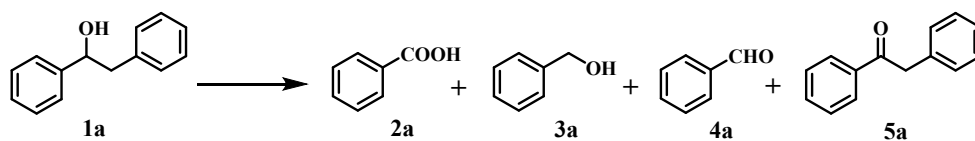

| Entry | Time | Conversion (%) | Yield (%) <sup>b</sup> |    |    |    | S <sub>C<math>\alpha</math>-C<math>\beta</math></sub> (%) |
|-------|------|----------------|------------------------|----|----|----|-----------------------------------------------------------|
|       |      |                | 2a                     | 3a | 4a | 5a |                                                           |
| 1     | 1 h  | 8              | 0                      | 0  | 4  | 3  | 50                                                        |
| 2     | 2 h  | 25             | 0                      | 1  | 15 | 7  | 64                                                        |
| 3     | 3 h  | 40             | 0                      | 1  | 27 | 7  | 70                                                        |
| 4     | 4 h  | 55             | 1                      | 2  | 38 | 12 | 74                                                        |
| 5     | 5 h  | 68             | 2                      | 2  | 46 | 11 | 74                                                        |
| 6     | 6 h  | 80             | 3                      | 2  | 56 | 15 | 76                                                        |
| 7     | 8 h  | 89             | 4                      | 2  | 63 | 14 | 77                                                        |
| 8     | 10 h | 95             | 9                      | 2  | 67 | 15 | 82                                                        |
| 9     | 12 h | 99             | 7                      | 1  | 75 | 15 | 84                                                        |

<sup>a</sup>Reaction conditions: 0.10 mmol **1a**, 3.0 mL CH<sub>2</sub>Cl<sub>2</sub>, 20 mg CBB/BWO (1:2), 30 W blue LEDs, O<sub>2</sub>. <sup>b</sup>The quantification was performed by means of HPGC analysis using acetophenone as an internal standard.

**Table S6.** Catalytic performances of CBB/BWO (1:2) with different reaction atmosphere.<sup>a</sup>

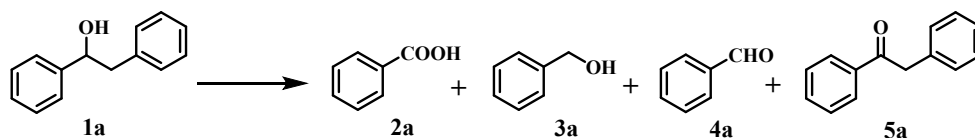

| Entry | Atmosphere     | Conversion (%) | Yield (%) <sup>b</sup> |    |    |    | $S_{Ca-C\beta}$ (%) |
|-------|----------------|----------------|------------------------|----|----|----|---------------------|
|       |                |                | 2a                     | 3a | 4a | 5a |                     |
| 1     | O <sub>2</sub> | 99             | 21                     | 1  | 62 | 12 | 85                  |
| 2     | Ar             | 6              | 0                      | 0  | 2  | 2  | 31                  |
| 3     | air            | 55             | 0                      | 2  | 41 | 4  | 78                  |

<sup>a</sup>Reaction conditions: 0.10 mmol **1a**, 3.0 mL CH<sub>2</sub>Cl<sub>2</sub>, 20 mg CBB/BWO (1:2), 30 W blue LEDs, 12 h. <sup>b</sup>The quantification was performed by means of HPGC analysis using acetophenone as an internal standard.

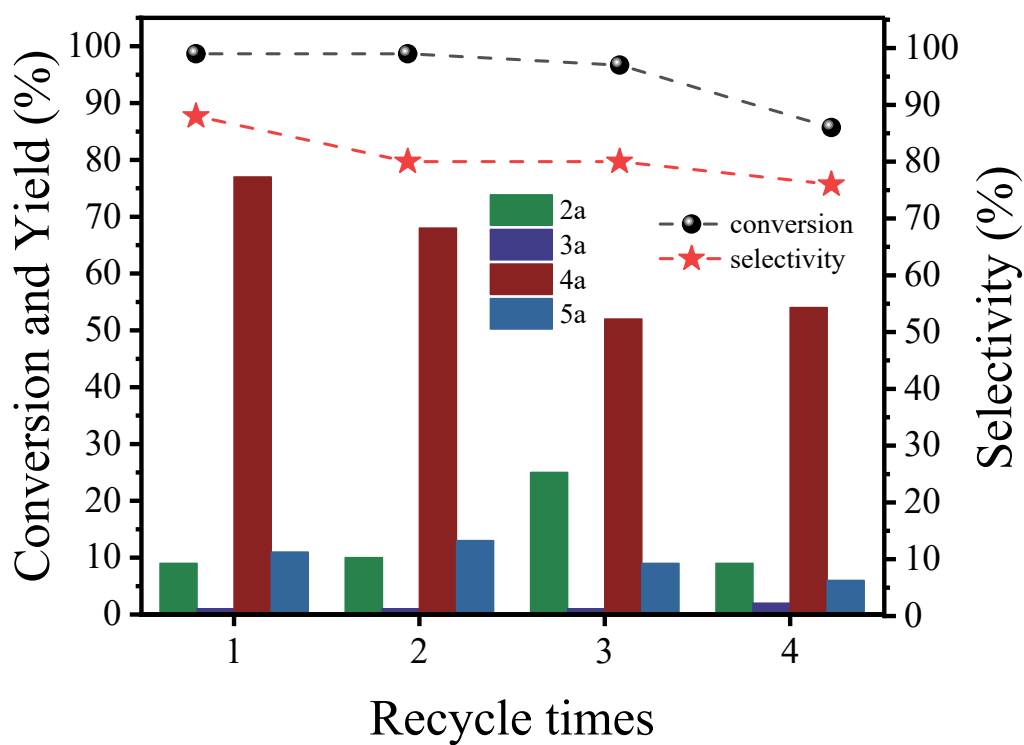

**Fig. S10.** Recycling experiment.

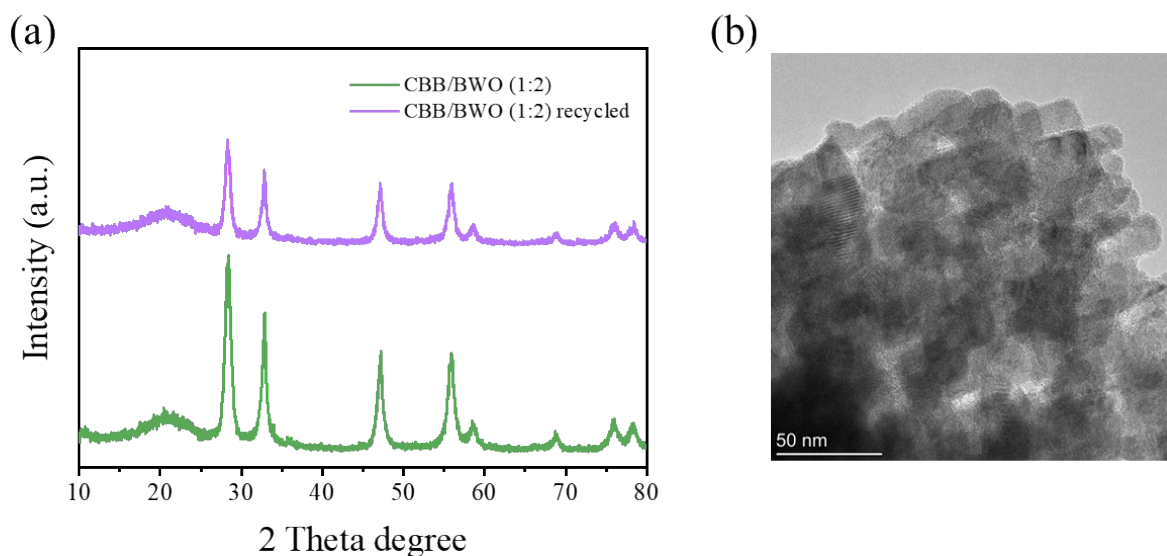

**Fig. S11.** (a) The XRD pattern and (b) TEM of the recycled CBB/BWO (1:2) after 4th catalytic cycle obtained via centrifugation.

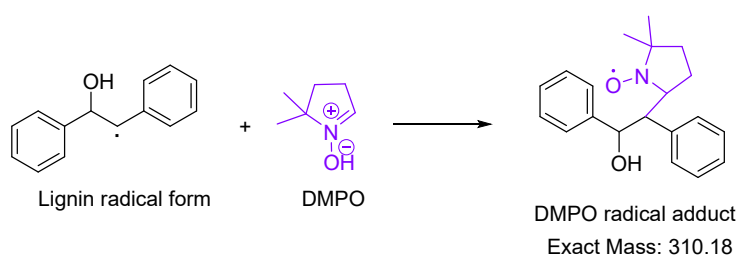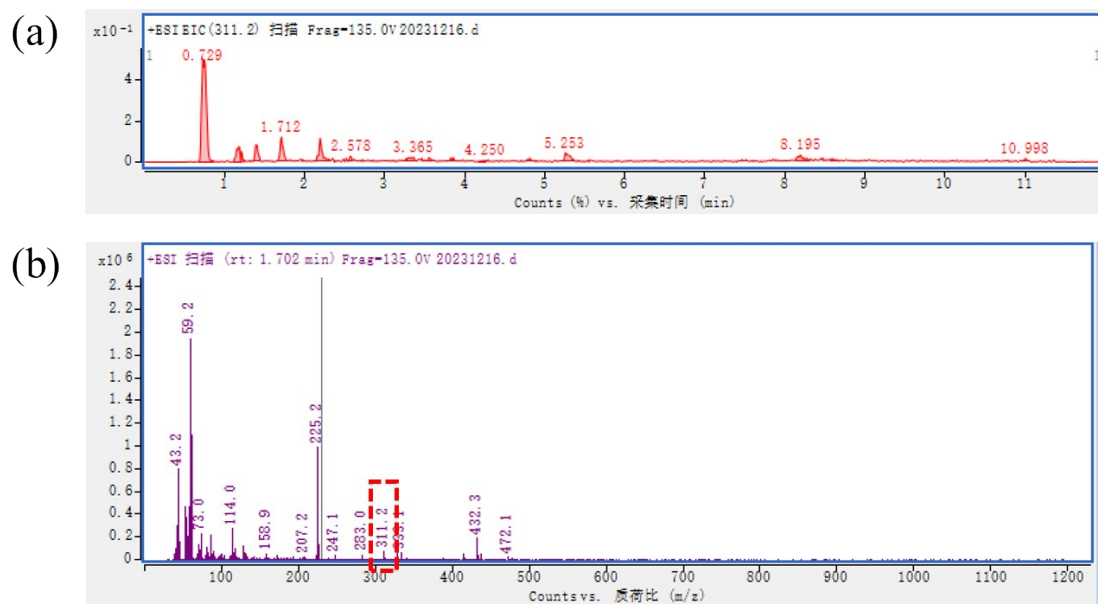

**Fig. S12.** HPLC-MS analysis of DMPO-captured experiments. (a) HPLC spectra of ion (Mw = 311). (b) Fragment information of ion (Mw = 311) at retention time of 1.702 min.

### 3. NMR Spectra

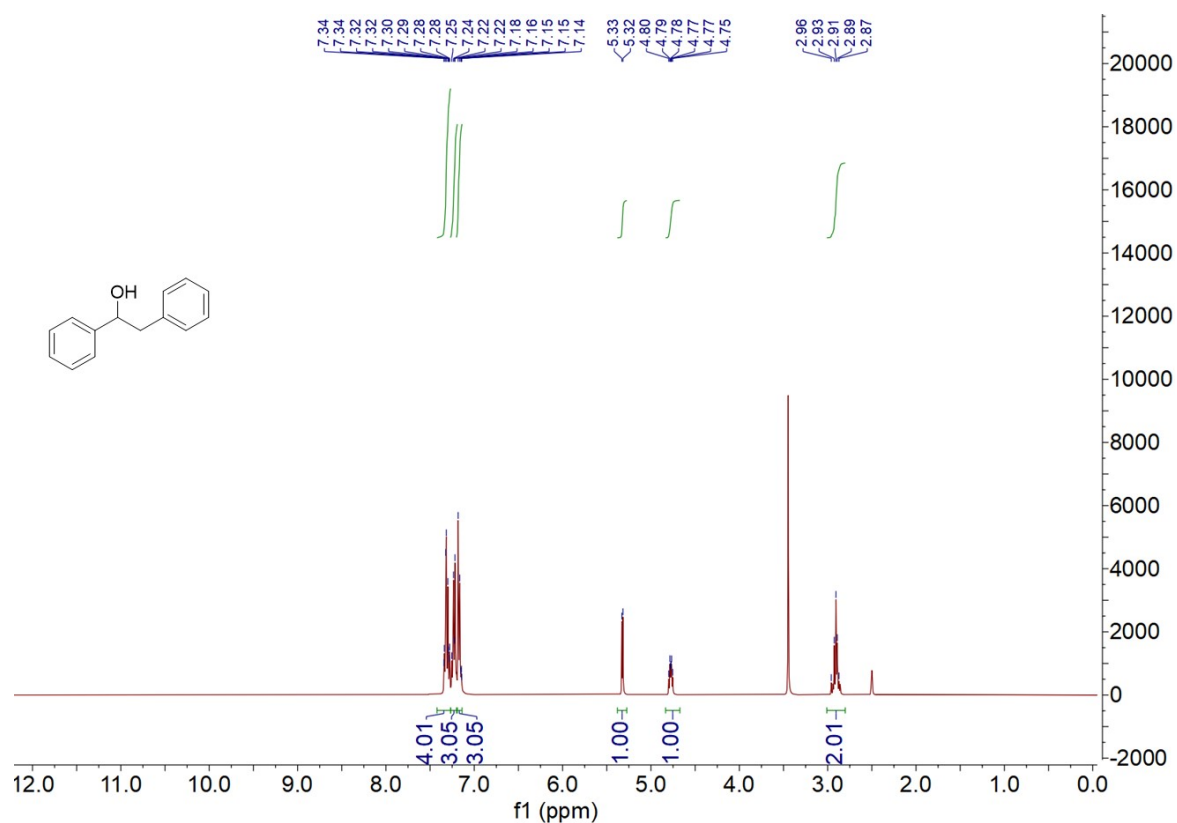

**Fig. S13.** <sup>1</sup>H NMR spectrum of 1,2-diphenylethan-1-ol (1a) (DMSO-*d*<sub>6</sub>, 400 MHz).

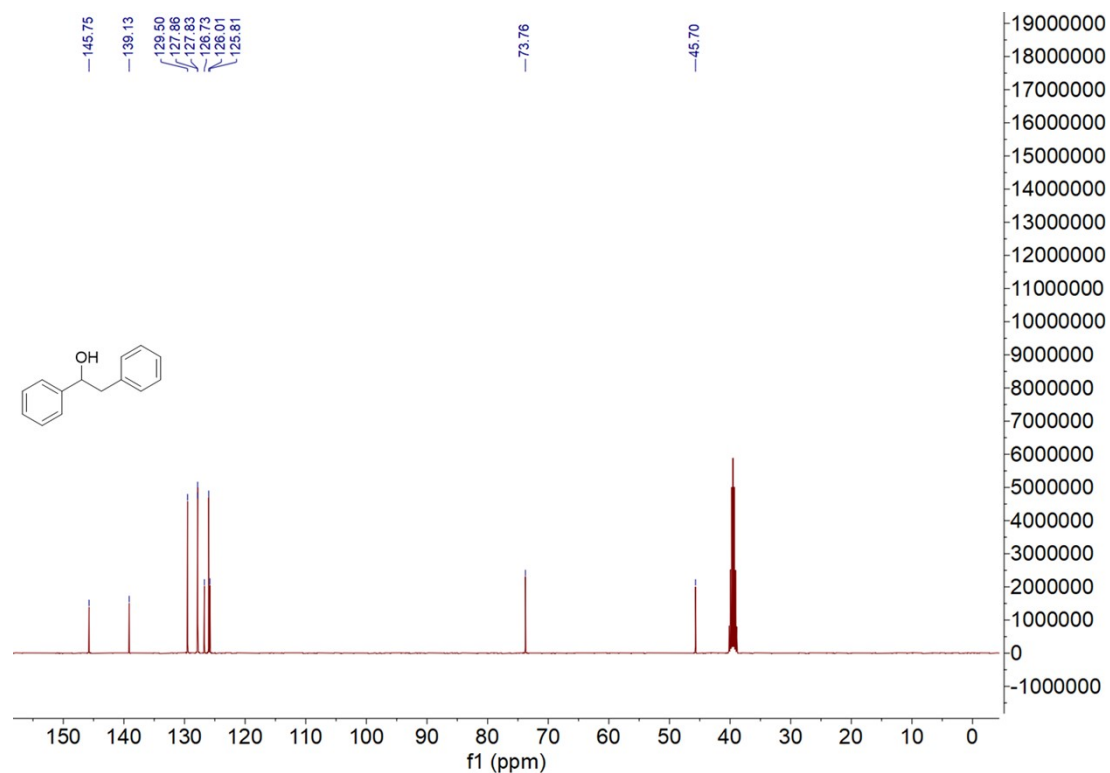

**Fig. S14.** <sup>13</sup>C NMR spectrum of 1,2-diphenylethan-1-ol (1a) (DMSO-*d*<sub>6</sub>, 101 MHz).



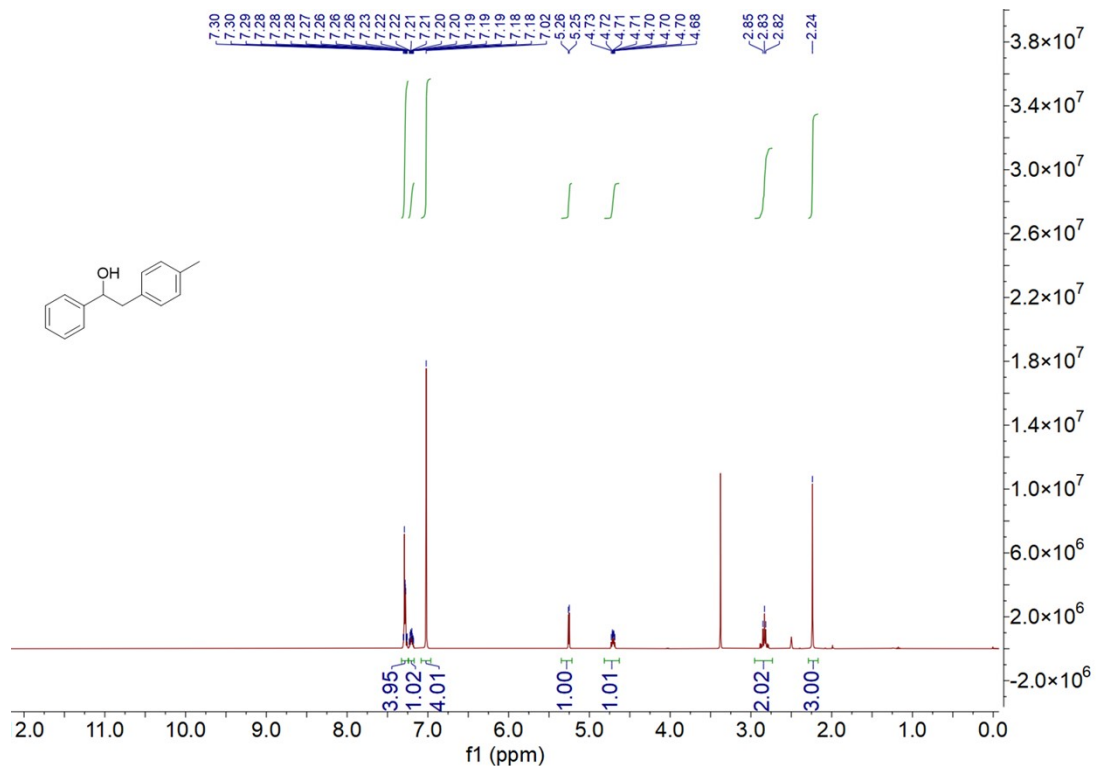

**Fig. S15.** <sup>1</sup>H NMR spectrum of 1-phenyl-2-(p-tolyl)ethan-1-ol (1b) (DMSO-*d*<sub>6</sub>, 400 MHz).

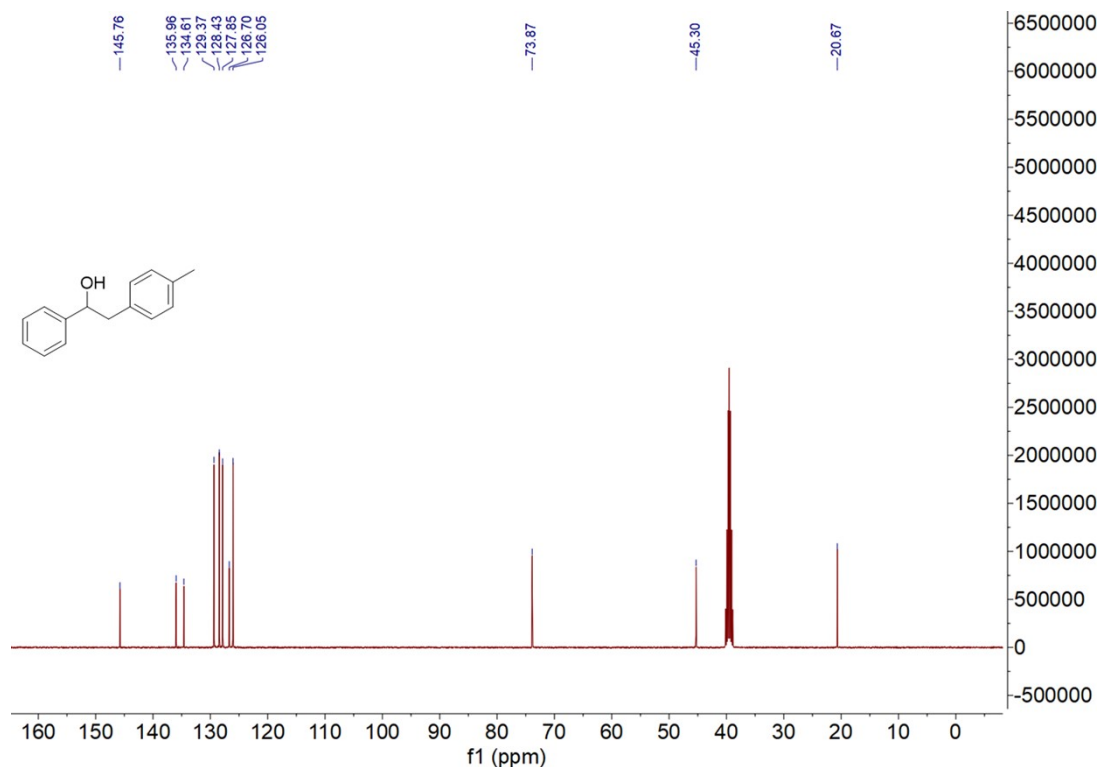

**Fig. S16.** <sup>13</sup>C NMR spectrum of 1-phenyl-2-(p-tolyl)ethan-1-ol (1b) (DMSO-*d*<sub>6</sub>, 101 MHz).

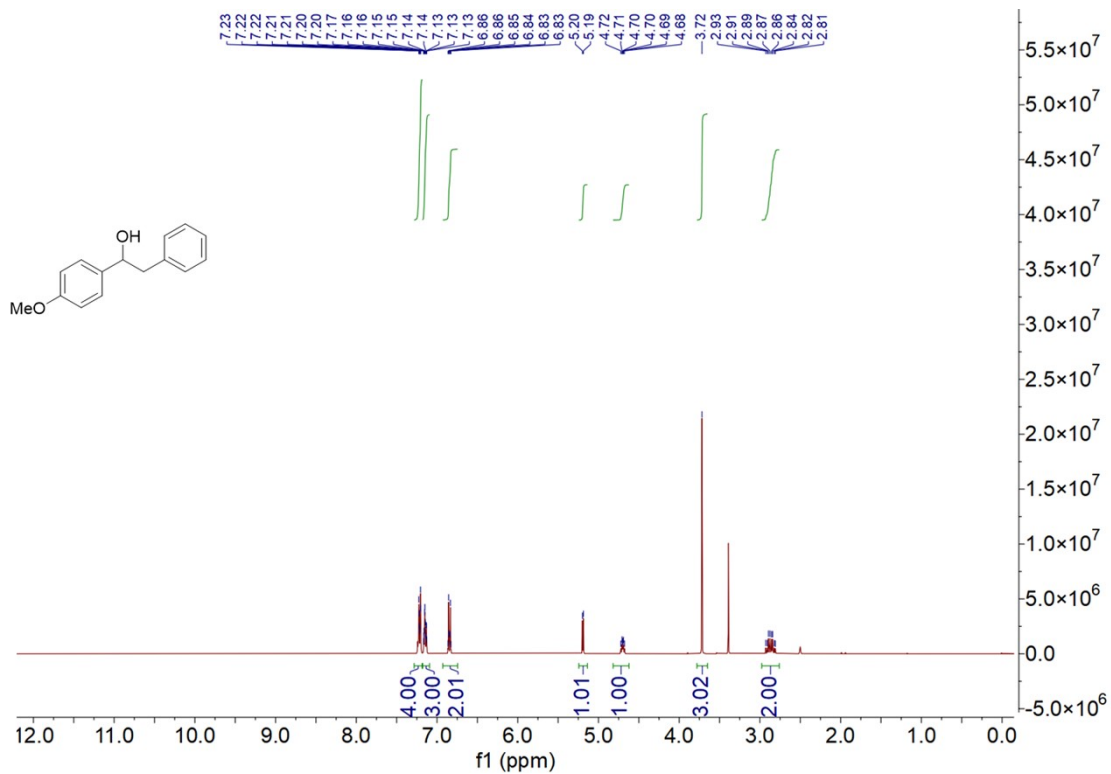

**Fig. S17.** <sup>1</sup>H NMR spectrum of 1-(4-methoxyphenyl)-2-phenylethan-1-ol (1c) (DMSO-*d*<sub>6</sub>, 400 MHz).

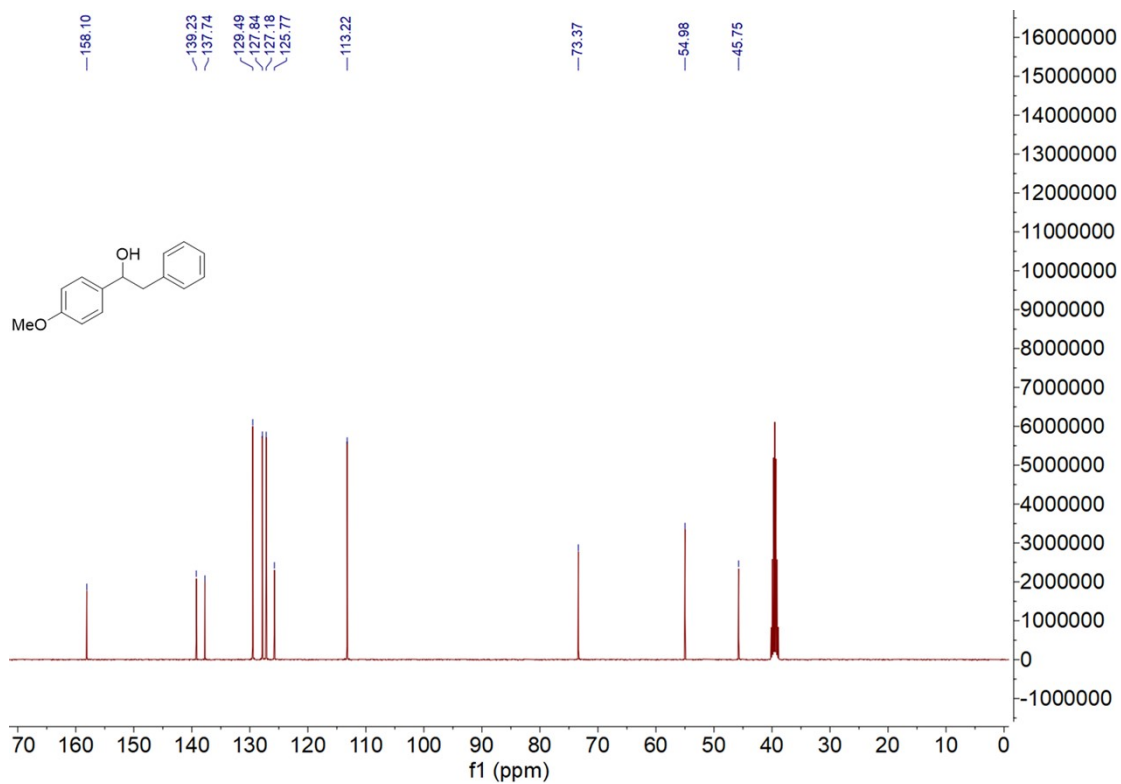

**Fig. S18.** <sup>13</sup>C NMR spectrum of 1-(4-methoxyphenyl)-2-phenylethan-1-ol (1c) (DMSO-*d*<sub>6</sub>, 101 MHz).

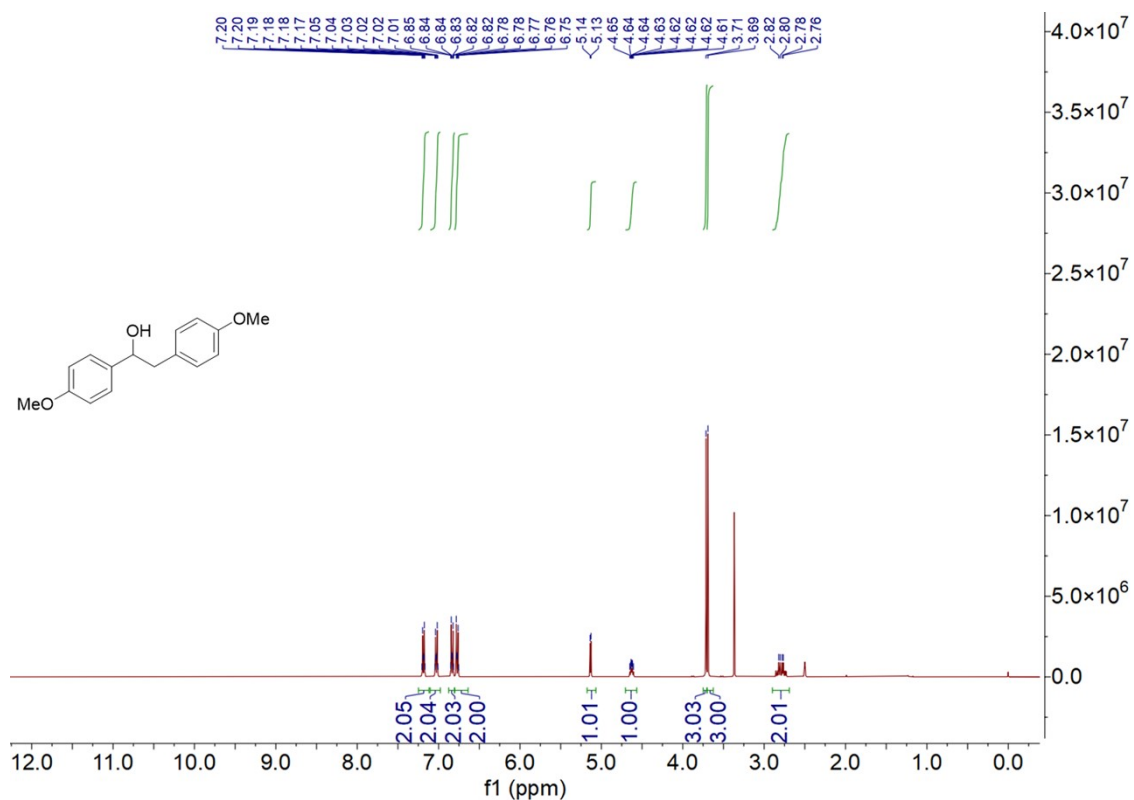

**Fig. S19.**  $^1\text{H}$  NMR spectrum of 1,2-bis(4-methoxyphenyl)ethan-1-ol (1d) ( $\text{DMSO-}d_6$ , 400 MHz).

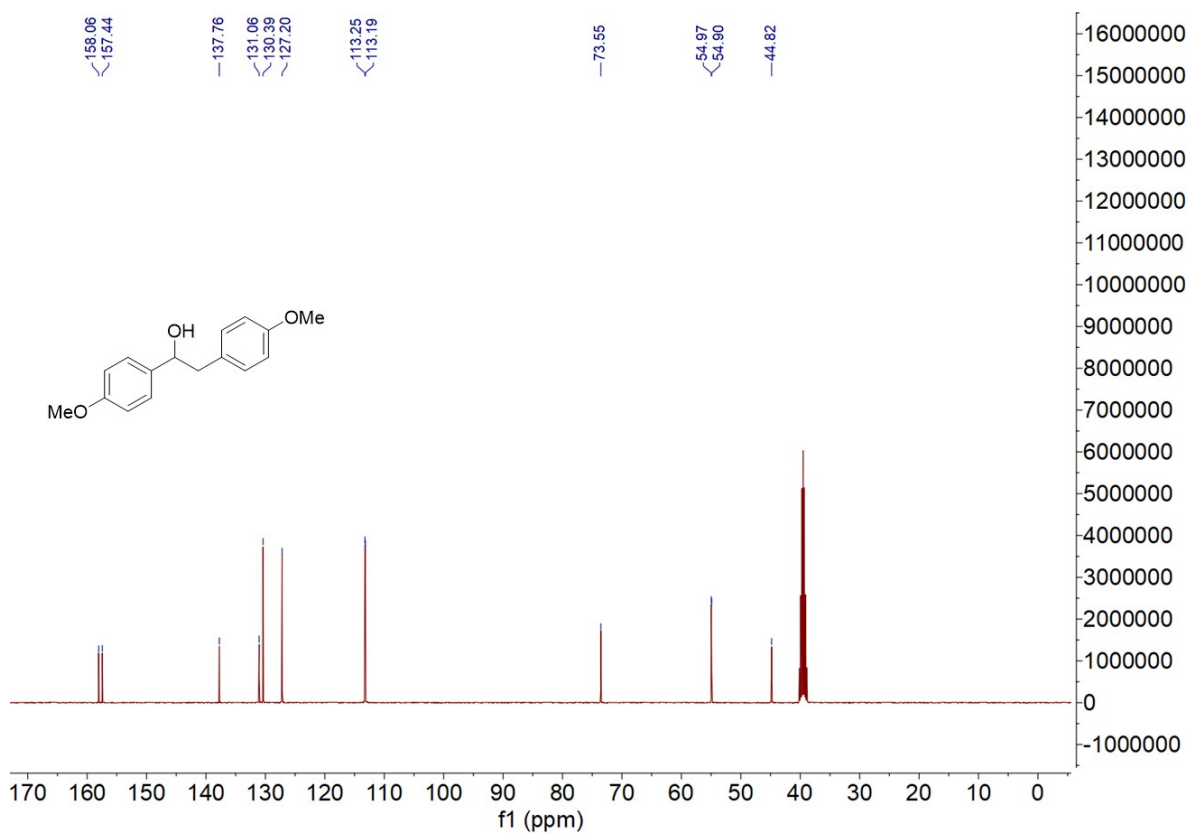

**Fig. S20.**  $^{13}\text{C}$  NMR spectrum of 1,2-bis(4-methoxyphenyl)ethan-1-ol (1d) ( $\text{DMSO-}d_6$ , 101 MHz).

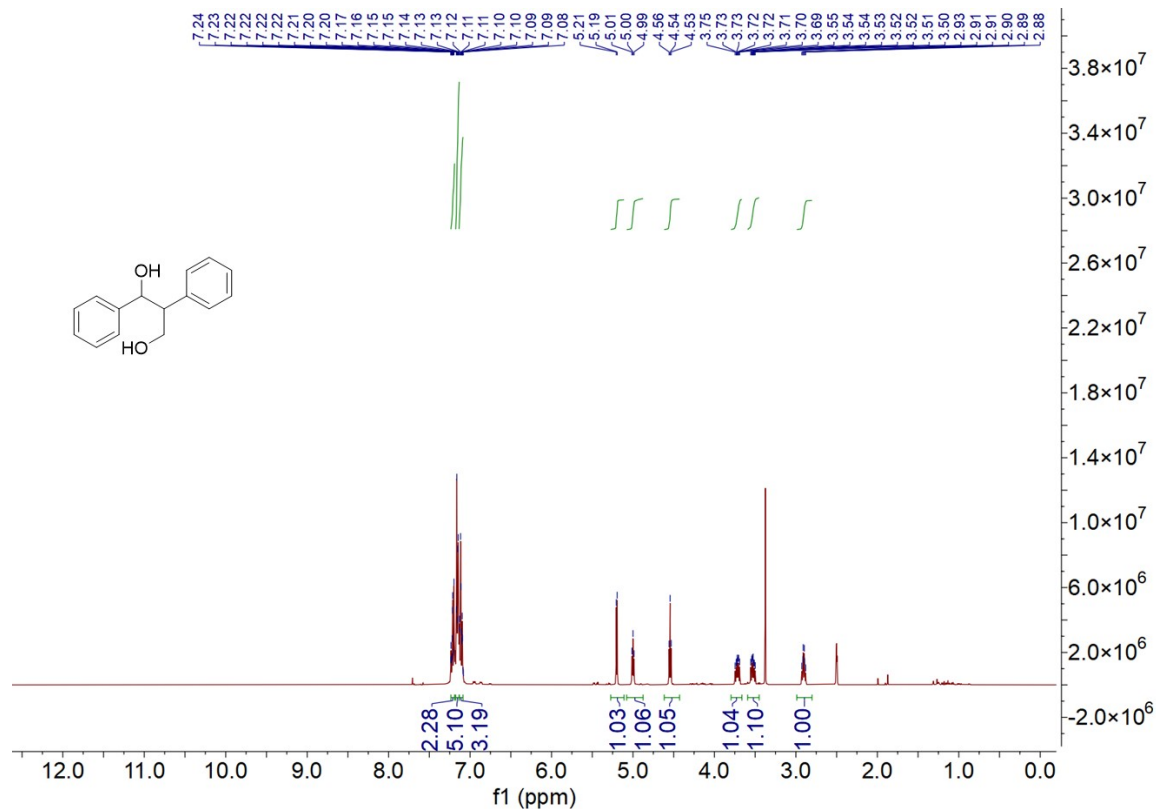

**Fig. S21.**  $^1\text{H}$  NMR spectrum of 1,2-diphenylpropane-1,3-diol (1e) ( $\text{DMSO-}d_6$ , 400 MHz).

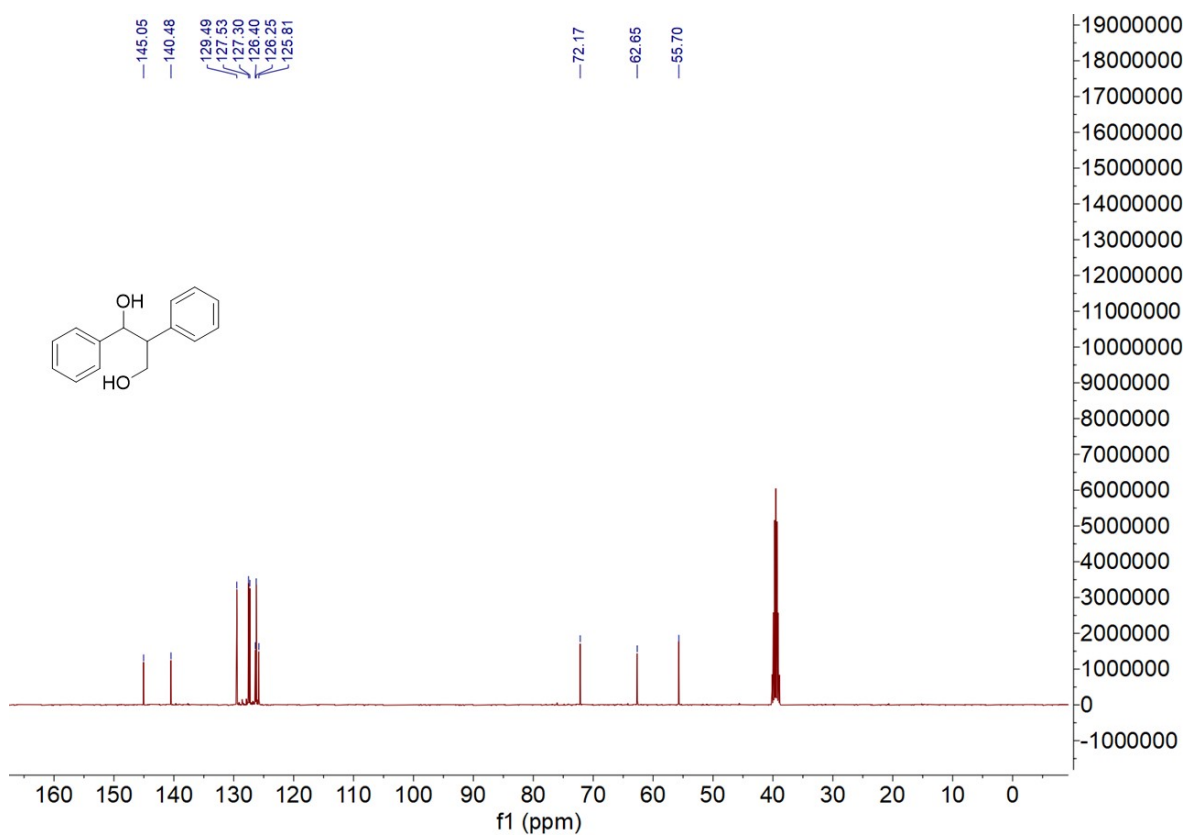

**Fig. S22.**  $^{13}\text{C}$  NMR spectrum of 1,2-diphenylpropane-1,3-diol (1e) ( $\text{DMSO-}d_6$ , 101 MHz).

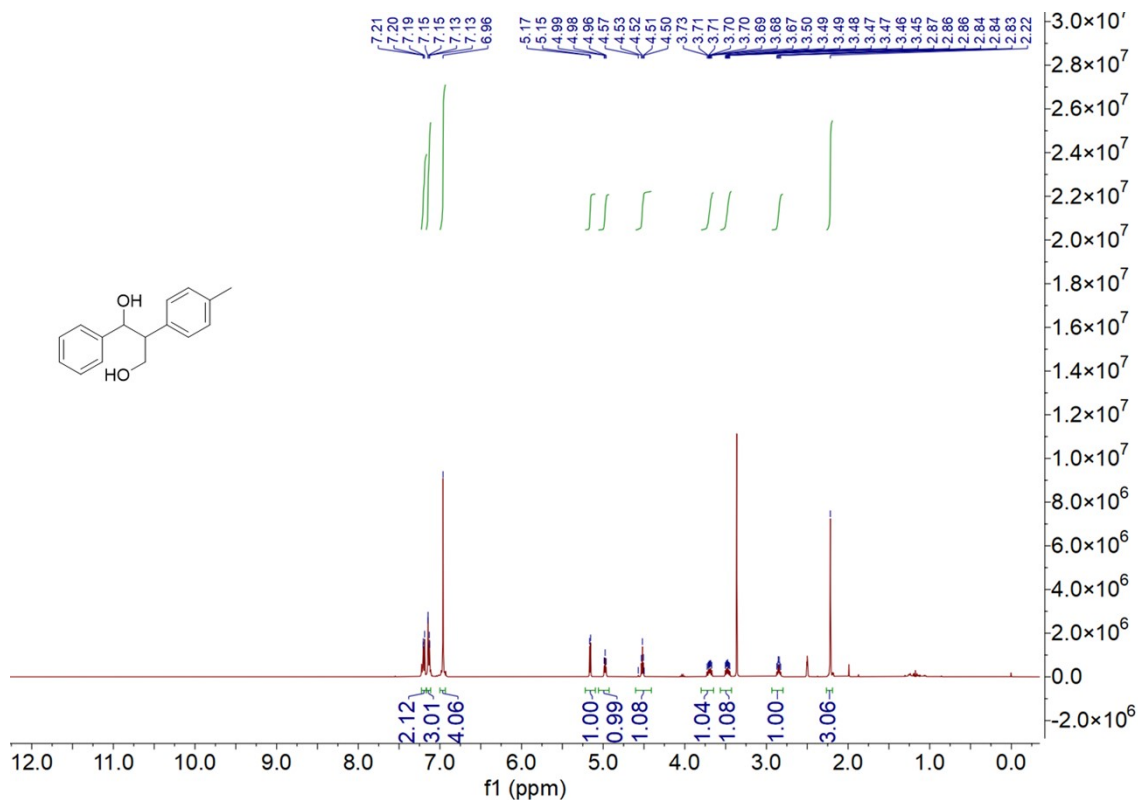

**Fig. S23.**  $^1\text{H}$  NMR spectrum of 1-phenyl-2-(p-tolyl)propane-1,3-diol (1f) ( $\text{DMSO-}d_6$ , 400 MHz).

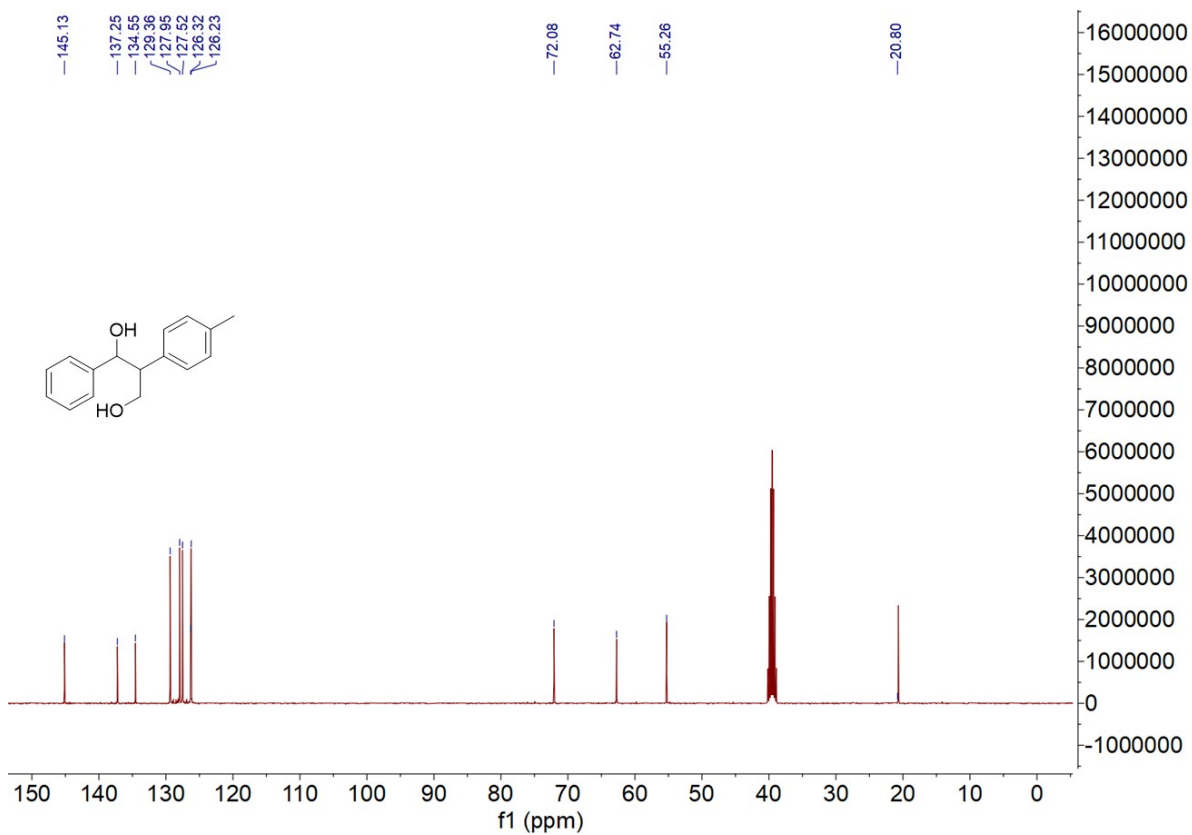

**Fig. S24.**  $^{13}\text{C}$  NMR spectrum of 1-phenyl-2-(p-tolyl)propane-1,3-diol (1f) ( $\text{DMSO-}d_6$ , 101 MHz).

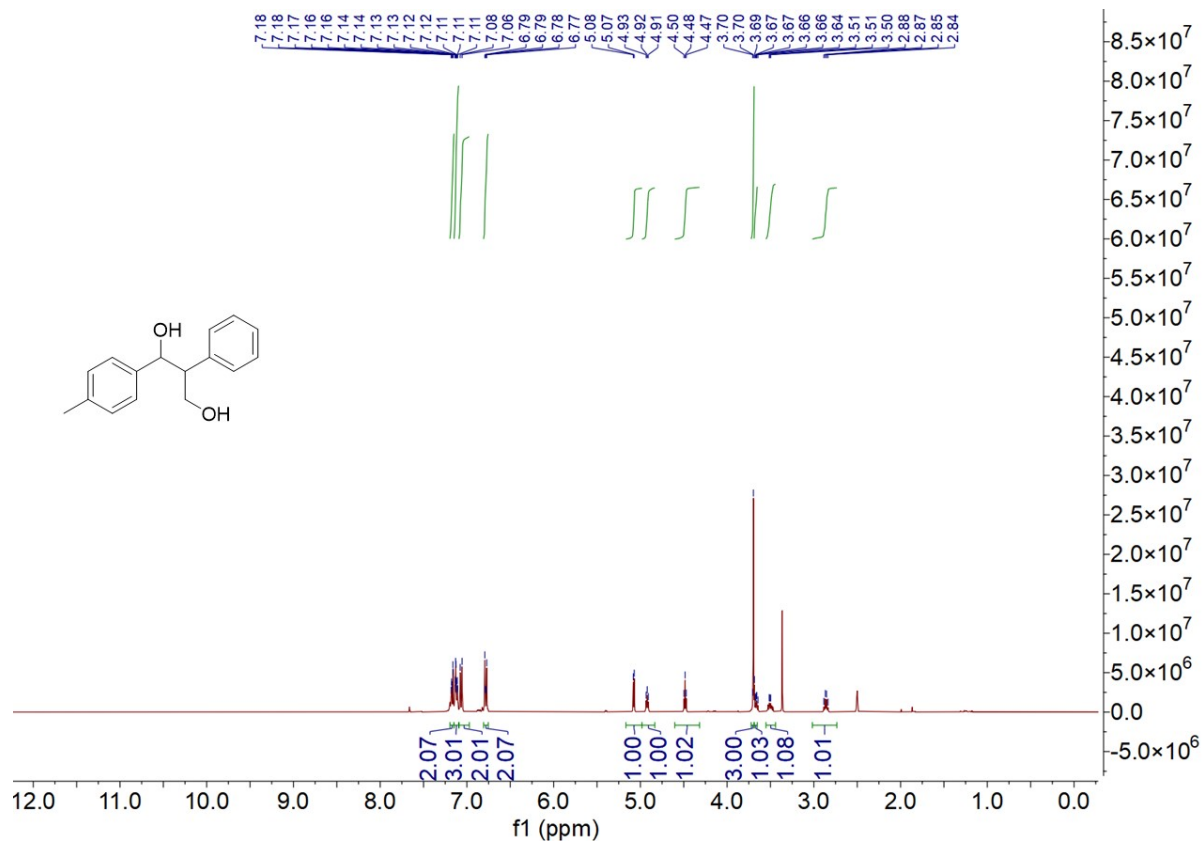

**Fig. S25.** <sup>1</sup>H NMR spectrum of 2-phenyl-1-(p-tolyl)propane-1,3-diol (1g) (DMSO-*d*<sub>6</sub>, 400 MHz).

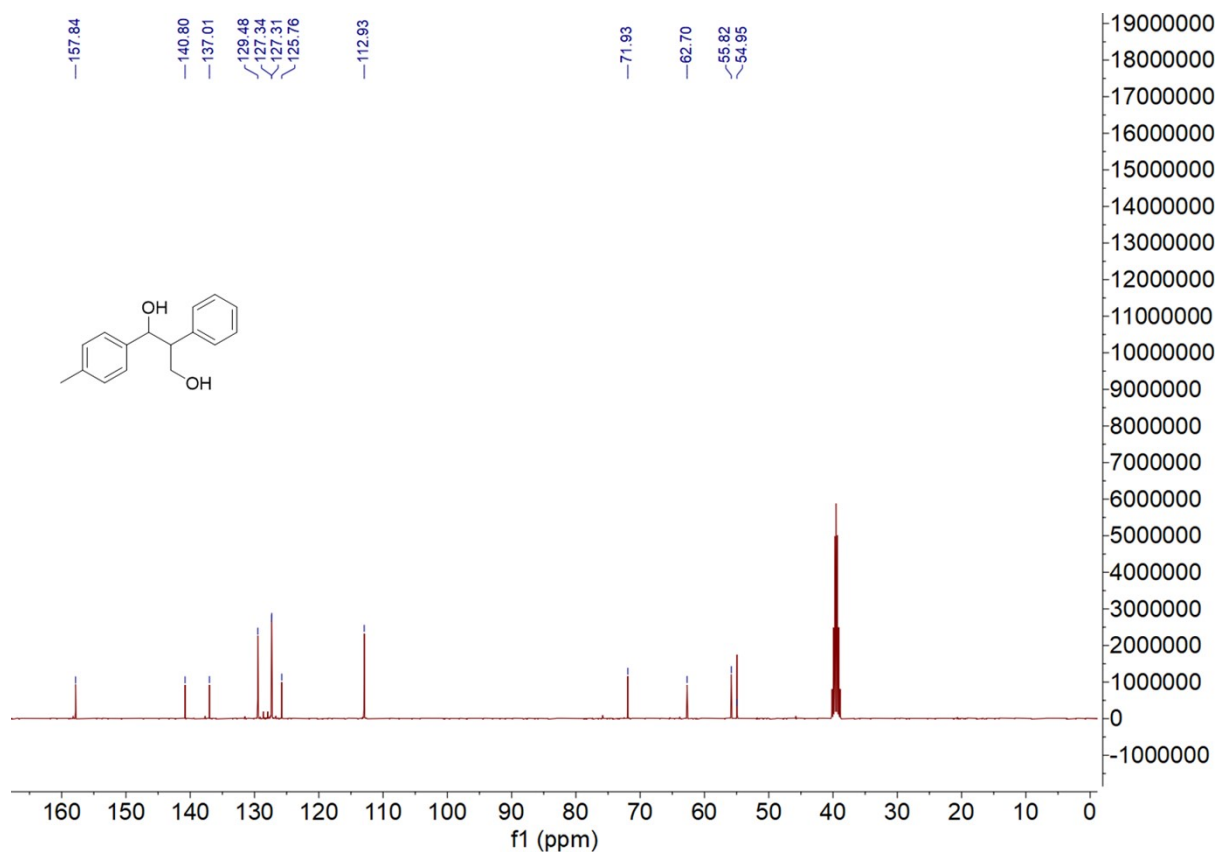

**Fig. S26.** <sup>13</sup>C NMR spectrum of 2-phenyl-1-(p-tolyl)propane-1,3-diol (1g) (DMSO-*d*<sub>6</sub>, 101 MHz).

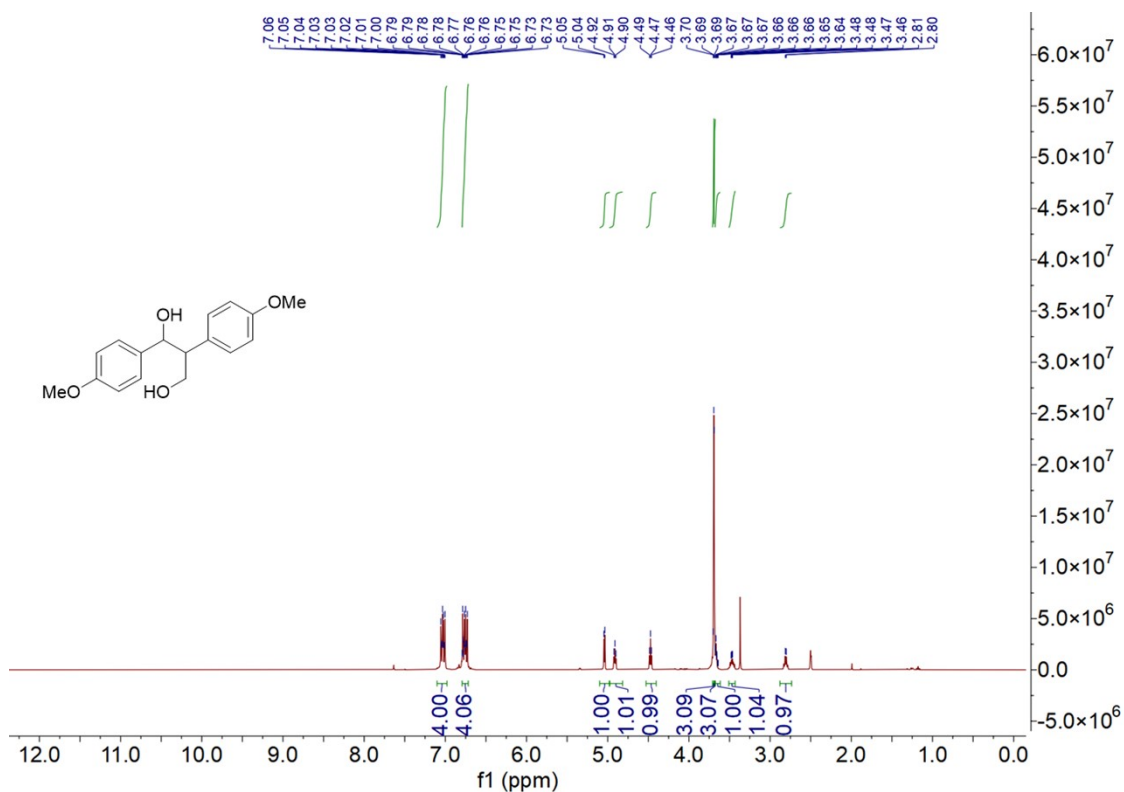

**Fig. S27.**  $^1\text{H}$  NMR spectrum of 1,2-bis(4-methoxyphenyl)propane-1,3-diol (1h) ( $\text{DMSO-}d_6$ , 400 MHz).

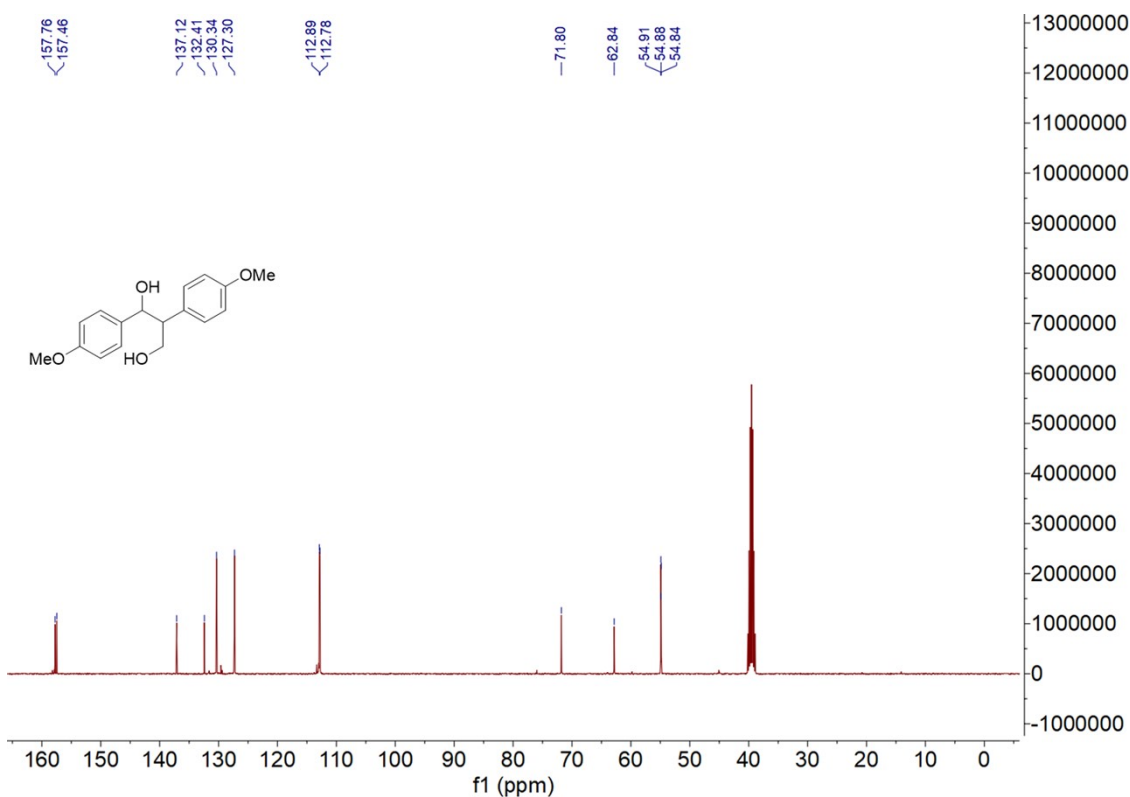

**Fig. S28.**  $^{13}\text{C}$  NMR spectrum of 1,2-bis(4-methoxyphenyl)propane-1,3-diol (1h) ( $\text{DMSO-}d_6$ , 101 MHz).

## 4. References

- Gan, Q.C., Qiao, J., Zhou, C., Ci, R.N., Guo, J.D., Chen, B., Tung, C.H., Wu, L.Z., 2023. Direct N-H activation to generate nitrogen radical for arylamine synthesis via quantum dots photocatalysis. *Angew. Chem. Int. Ed.* 62(17), e202218391. <https://doi.org/10.1002/anie.202218391>.
- Wu, X., Lin, J., Zhang, H., Xie, S., Zhang, Q., Sels, B.F., Wang, Y., 2021. Z-scheme nanocomposite with high redox ability for efficient cleavage of lignin C-C bonds under simulated solar light. *Green Chem.* 23(24), 10071-10078. <https://doi.org/10.1039/d1gc03455c>.
